# Supplementary material
Source: Research Square preprint supplement (doi:10.21203/rs.3.rs-10252535/v1)
Supplement: Supplementary file 1 [file bf3ed0fe50766432aa2ceb04.docx]

# **STROBE Checklist**

*Strengthening the Reporting of Observational Studies in Epidemiology (STROBE)*

**Manuscript:** Lumbosacral Transitional Vertebrae Detected on Routine Sacroiliac Joint Radiographs in a Rheumatology Cohort: Comparison of Castellvi and Jenkins Systems

**Study design:** Retrospective observational cohort study

*This checklist was completed according to the STROBE Statement for cohort studies.*

| **Item No.** | **Section / Topic** | **STROBE Recommendation** | **Reported on page / section** |
| --- | --- | --- | --- |
| **1** | Title and abstract | Indicate the study’s design with a commonly used term in the title or the abstract | Title, Abstract (Purpose) |
| **2** | Introduction | Explain the scientific background and rationale for the investigation being reported | Introduction, Abstract (Purpose) |
| **3** | Introduction | State specific objectives, including any prespecified hypotheses | Abstract (Purpose) |
| **4** | Methods | Present key elements of study design early in the paper | Patients and methods |
| **5** | Methods | Describe the setting, locations, and relevant dates, including periods of recruitment, exposure, follow-up, and data collection | Patients and methods |
| **6** | Methods | Give the eligibility criteria, and the sources and methods of selection of participants | Patients and methods |
| **7** | Methods | Clearly define all outcomes, exposures, predictors, potential confounders, and effect modifiers. Give diagnostic criteria, if applicable | Patients and methods, Results |
| **8** | Methods | For each variable of interest, give sources of data and details of methods of assessment (measurement). Describe comparability of assessment methods if there is more than one group | Patients and methods |
| **9** | Methods | Describe any efforts to address potential sources of bias | Patients and methods |
| **10** | Methods | Explain how the study size was arrived at | Patients and methods |
| **11** | Methods | Explain how quantitative variables were handled in the analyses. If applicable, describe which groupings were chosen and why | Patients and methods, Results |
| **12** | Methods | Describe all statistical methods, including those used to control for confounding | Patients and methods, Results |
| **13** | Results | Report numbers of individuals at each stage of study—eg numbers potentially eligible, examined for eligibility, confirmed eligible, included in the study, completing follow-up, and analysed | Patients and methods, Results |
| **14** | Results | Give reasons for non-participation at each stage | Patients and methods |
| **15** | Results | Give characteristics of study participants (eg demographic, clinical, social) and information on exposures and potential confounders | Results, Table 3 |
| **16** | Results | Give unadjusted estimates and, if applicable, confounder-adjusted estimates and their precision (eg, 95% confidence interval). Make clear which confounders were adjusted for and why they were included | Results |
| **17** | Results | Report other analyses done—eg analyses of subgroups and interactions, and sensitivity analyses | Results |
| **18** | Discussion | Summarise key results with reference to study objectives | Discussion |
| **19** | Discussion | Discuss limitations of the study, taking into account sources of potential bias or imprecision. Discuss both direction and magnitude of any potential bias | Limitations |
| **20** | Discussion | Give a cautious overall interpretation of results considering objectives, limitations, multiplicity of analyses, results from similar studies, and other relevant evidence | Discussion, Conclusions |
| **21** | Discussion | Discuss the generalisability (external validity) of the study results | Limitations |
| **22** | Other information | Give the source of funding and the role of the funders for the present study and, if applicable, for the original study on which the present article is based | Funding, Ethical Approval |

**Reference:**

von Elm E, Altman DG, Egger M, Pocock SJ, Gøtzsche PC, Vandenbroucke JP; STROBE Initiative. The Strengthening the Reporting of Observational Studies in Epidemiology (STROBE) statement: guidelines for reporting observational studies. PLoS Med. 2007;4(10):e296. doi:10.1371/journal.pmed.0040296

*This checklist is provided as Supplementary Material for the above manuscript submitted to European Spine Journal.*
